# Supplementary material for: Distinct Roles of Plasmodium Rhomboid 1 in Parasite Development and Malaria Pathogenesis
Source: PubMed Central journal article supplement (PMC2607553; doi:10.1371/journal.ppat.1000262), 2009-01-16
Supplement: ppat.1000262.s001.pdf [file ppat.1000262.s001.pdf]

|  |  |  |
|--|--|--|
|  |  |  |
|  |  |  |
|  |  |  |
|  |  |  |

100
