# Supplementary material for: Distinct Roles of Plasmodium Rhomboid 1 in Parasite Development and Malaria Pathogenesis
Source: PubMed Central journal article supplement (PMC2607553; doi:10.1371/journal.ppat.1000262), 2009-01-16
Supplement: ppat.1000262.s003.pdf [file ppat.1000262.s003.pdf]

**Table S1****PbROM1 is not required for ookinete formation**

| <b>Experiment</b> | <b>Ookinetes/mosquito</b> | <b>Prevalence (%)</b> | <b>P value</b> |
|-------------------|---------------------------|-----------------------|----------------|
| 1. WT (5)         | 6592                      | 100                   |                |
| 2. WT(5)          | 5697                      | 100                   |                |
| 1. PbROM1(-) (10) | 6917                      | 100                   |                |
| 2. PbROM1(-) (10) | 6811                      | 100                   |                |
| <b>Total</b>      |                           |                       |                |
| WT (10)           | 6144                      | 100                   |                |
| PbROM1(-) (20)    | 6864                      | 100                   | > 0.05         |

The mean number of ookinetes/mosquito was determined by examination of Giemsa-stained smears of mosquito midgut contents as described in Materials and Methods. Numbers in parenthesis indicate the number of individual mosquitoes that were assayed for ookinete numbers.
