# Supplementary material for: Distinct Roles of Plasmodium Rhomboid 1 in Parasite Development and Malaria Pathogenesis
Source: PubMed Central journal article supplement (PMC2607553; doi:10.1371/journal.ppat.1000262), 2009-01-16
Supplement: ppat.1000262.s004.pdf [file ppat.1000262.s004.pdf]

**Table S2****PbROM1 is required for efficient infection of the mosquito**

|                 | Oocysts/midgut |        | Prevalence (%) | Inhibition (%) | P value  |
|-----------------|----------------|--------|----------------|----------------|----------|
|                 | Mean           | Median |                |                |          |
| <b>Expt 1</b>   |                |        |                |                |          |
| WT (24)         | 167            | 135    | 87             |                |          |
| WT (23)         | 79             | 50     | 100            |                |          |
| WT (15)         | 182            | 160    | 100            |                |          |
| PbROM1(-) (23)  | 40             | 12     | 83             | 76 - 93        |          |
| PbROM1(-) (23)  | 28             | 18     | 91             | 65 - 89        |          |
| PbROM1(-) (16)  | 3              | 5      | 87             | 90 - 97        |          |
| <b>Expt 2</b>   |                |        |                |                |          |
| WT (16)         | 163            | 160    | 94             |                |          |
| WT (25)         | 213            | 210    | 97             |                |          |
| PbROM1(-) (24)  | 26             | 20     | 88             | 88 - 91        |          |
| PbROM1(-) (20)  | 10             | 7      | 85             | 96 - 97        |          |
| PbROM1(-) (25)  | 124            | 106    | 92             | 22 - 50        |          |
| PbROM1(-) (20)  | 55             | 21     | 90             | 87 - 90        |          |
| <b>Total</b>    |                |        |                |                |          |
| WT (103)        | 160            | 150    | 95             |                |          |
| PbROM1(-) (153) | 47             | 15     | 89             | 90             | < 0.0001 |

A total of 5 mice infected with WT parasites and 7 mice infected with ROM1(-) parasites were each fed to a different group of mosquitoes. Oocysts were counted 15 days after infection. Numbers in parenthesis indicate the number of individual mosquitoes that were examined. Inhibition of oocyst formation was calculated using median oocyst values. The range of inhibition observed based on the lowest and highest median oocyst numbers of WT infection is shown.
