# Supplementary material for: Distinct Roles of Plasmodium Rhomboid 1 in Parasite Development and Malaria Pathogenesis
Source: PubMed Central journal article supplement (PMC2607553; doi:10.1371/journal.ppat.1000262), 2009-01-16
Supplement: ppat.1000262.s005.pdf [file ppat.1000262.s005.pdf]

**Table S3**

One way ANOVA test for assessing statistical significance of differences in WT and ROM1(-) oocyst numbers

| Mean Oocysts | Infection | 182<br>WT1 | 79<br>WT2 | 167<br>WT3 | 162<br>WT4 | 213<br>WT5 |
|--------------|-----------|------------|-----------|------------|------------|------------|
| 182          | WT1       |            |           |            |            |            |
| 79           | WT2       | ns         |           |            |            |            |
| 167          | WT3       | ns         | ns        |            |            |            |
| 162          | WT4       | ns         | ns        | ns         |            |            |
| 213          | WT5       | ns         | ***       | ns         | ns         |            |
| 40           | ROM1(-)1  | **         | ns        | ***        | **         | ***        |
| 28           | ROM1(-)2  | ***        | ns        | ***        | **         | ***        |
| 30           | ROM1(-)3  | ***        | ns        | ***        | **         | ***        |
| 26           | ROM1(-)4  | ***        | ns        | ***        | ***        | ***        |
| 10           | ROM1(-)5  | ***        | ns        | ***        | ***        | ***        |
| 124          | ROM1(-)6  | ns         | ns        | ns         | ns         | ns         |
| 55           | ROM1(-)7  | **         | ns        | **         | *          | ***        |

*An. stephensi* mosquitoes were fed separately on one of 5 mice infected with WT parasites or on one of 7 mice infected with ROM1(-) parasites. In six out of seven experiments, mosquitoes that were fed on ROM1(-) parasites formed significantly lower number of oocysts when compared to four out of five experiments using mice infected with WT parasites. P values and confidence intervals are corrected for multiple comparisons using the Boferroni's multiples comparison test (\*\*\*: P<0.001; \*\*: P<0.01; \*: P<0.05, ns: P>0.05)
