# Supplementary material for: Distinct Roles of Plasmodium Rhomboid 1 in Parasite Development and Malaria Pathogenesis
Source: PubMed Central journal article supplement (PMC2607553; doi:10.1371/journal.ppat.1000262), 2009-01-16
Supplement: ppat.1000262.s006.pdf [file ppat.1000262.s006.pdf]

**Table S4**

**PbROM1 is not required for sporozoite invasion of mosquito salivary glands**

| <b>Experiment</b> | <b>Oocysts/mosquito</b> | <b>Spz/oocyst</b> | <b>SG spz/<br/>100 MG spz</b> | <b>Prevalence<br/>(%)</b> | <b>P value</b> |
|-------------------|-------------------------|-------------------|-------------------------------|---------------------------|----------------|
| 1. WT (19)        | 213                     | 723               | 29                            | 96                        |                |
| 2. WT (12)        | 163                     | 939               | 21                            | 100                       |                |
| 3. WT (15)        | 182                     | 842               | 34                            | 100                       |                |
| 1. PbROM1(-) (17) | 26                      | 1013              | 23                            | 87.5                      |                |
| 2. PbROM1(-) (15) | 55                      | 285               | 18                            | 90                        |                |
| 3. PbROM1(-) (18) | 124                     | 973               | 13                            | 92                        |                |
| 4. PbROM1(-) (14) | 10                      | 2214              | 21                            | 85                        |                |
| <b>Total</b>      |                         |                   |                               |                           |                |
| WT (46)           | 186                     | 835               | 25                            |                           |                |
| PbROM1(-) (54)    | 54                      | 1121              | 20                            |                           | > 0.05         |

Sporozoites were isolated either from midgut oocysts (day 25-26) or from salivary glands (day 25-26) of infected mosquitoes and counted with the aid of a hemocytometer. Sporozoite counts were normalized against total oocyst count (day 15) and mosquito infection prevalence. As all salivary gland sporozoites come from oocysts, the sum of midgut and salivary gland sporozoites was taken as total oocyst sporozoites. Numbers in parenthesis indicate the number of individual mosquitoes that were analyzed for sporozoites.
